# Supplementary material for: A comprehensive and synthetic dataset for global, regional, and national greenhouse gas emissions by sector 1970–2018 with an extension to 2019
Source: Copernicus journal article supplement (doi:10.5194/essd-13-5213-2021), 2021-11-10
Supplement: Supplementary file 1 [file essd-13-5213-2021-supplement.pdf]

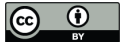

*Supplement of*

**A comprehensive and synthetic dataset for global, regional, and national greenhouse gas emissions by sector 1970–2018 with an extension to 2019**

**Jan C. Minx et al.**

*Correspondence to:* Jan C. Minx ([minx@mcc-berlin.net](mailto:minx@mcc-berlin.net)) and William F. Lamb ([lamb@mcc-berlin.net](mailto:lamb@mcc-berlin.net))

The copyright of individual parts of the supplement might differ from the article licence.

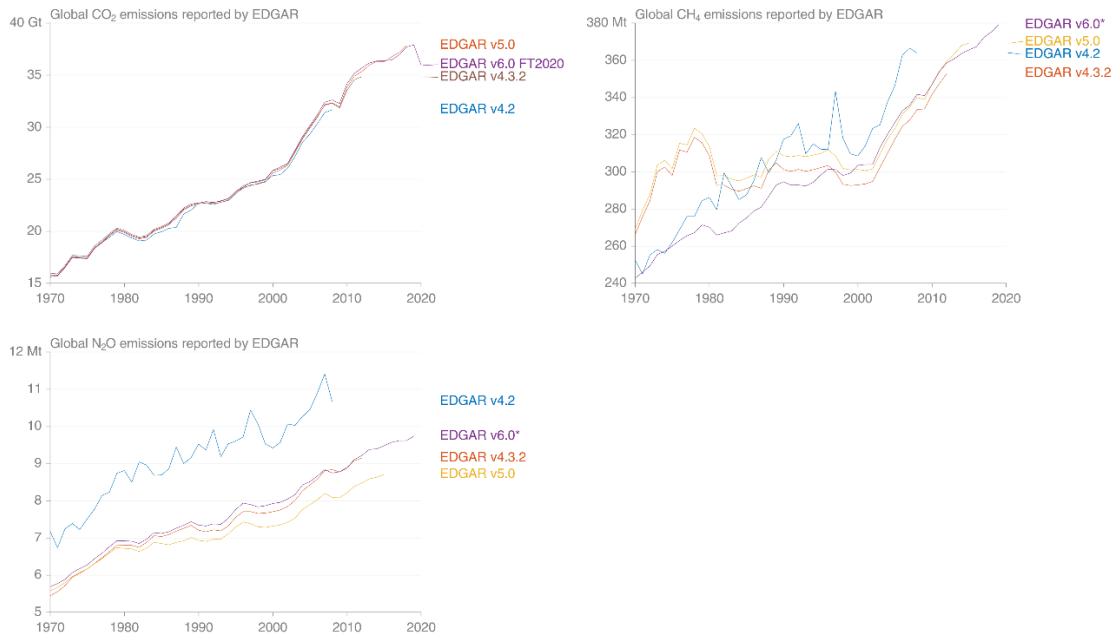

28 **Figure S1 - Comparison of emission estimates for CO<sub>2</sub>-FFI, CH<sub>4</sub> and N<sub>2</sub>O for EDGAR version 4.2, 4.3.2, v5 and v6.**  
29 **Emissions are reported per year in native units.**

30

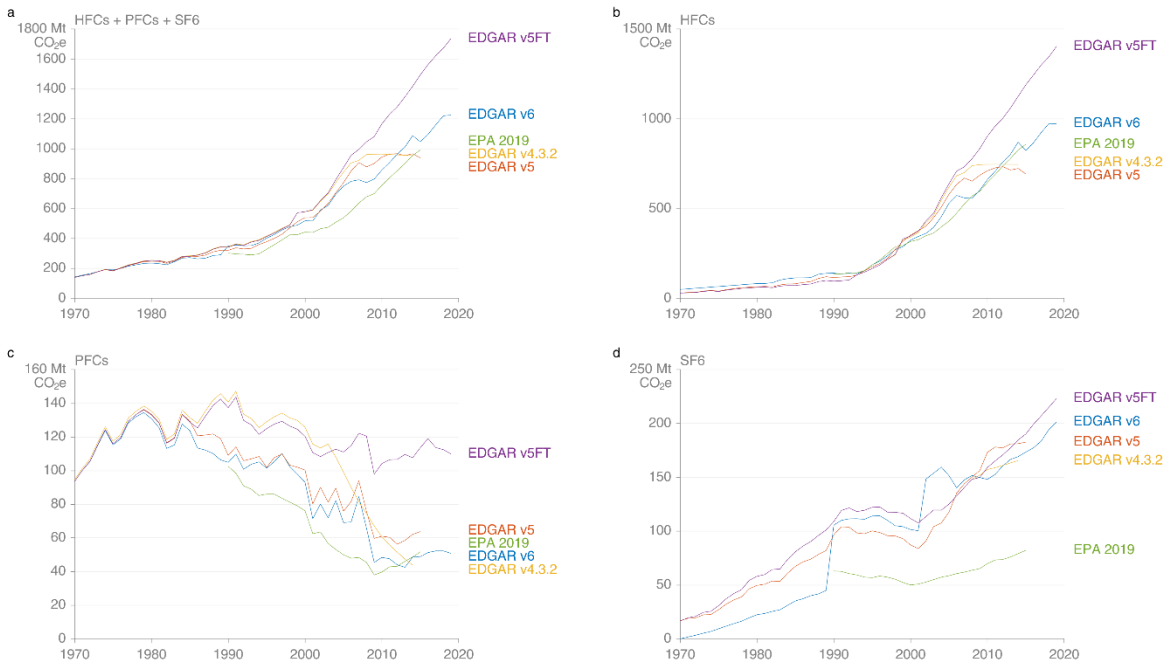

31

32 **Figure S2 - Comparison of emission estimates for total fluorinated gases and groups of species from different versions**  
33 **of the EDGAR database (v4.3.2, v5, v6), the EDGARv5FT produced by Olivier and Peters (2020), and US-EPA (2019):**  
34 **Hydrofluorocarbons (HFCs), Perfluorocarbons (PFCs) and Sulphur hexafluoride (SF<sub>6</sub>).** To enable comparison with US-  
35 **EPA data emissions are reported in MtCO<sub>2</sub>eq per year using global warming potential from IPCC AR4 (Forster et al.,**  
36 **2007).**

37

38  
39

**Table S1 - Average annual anthropogenic GHG emissions and emissions growth by decade/year and world region for 1970-2018: Aggregate GHG emission trends are reported in GtCO<sub>2</sub>eq converted based on global warming potentials with a 100-year time horizon (GWP-100) from the IPCC Sixth Assessment Report (Forster et al., 2021).**

|           | Africa |        | Middle East |        | Asia & Developing Pacific |        | Developed Countries |        | Eastern Europe and West-Central Asia |        | Latin America & Caribbean |        | International Aviation & Shipping |        |
|-----------|--------|--------|-------------|--------|---------------------------|--------|---------------------|--------|--------------------------------------|--------|---------------------------|--------|-----------------------------------|--------|
|           | Levels | Growth | Levels      | Growth | Levels                    | Growth | Levels              | Growth | Levels                               | Growth | Levels                    | Growth | Levels                            | Growth |
| 2018      | 5.0    |        | 3.2         |        | 25                        |        | 14                  |        | 3.5                                  |        | 5.6                       |        | 1.4                               |        |
| 2009-2018 | 4.6    | 1.9%   | 2.8         | 2.8%   | 23                        | 2.3%   | 15                  | -0.5%  | 3.3                                  | 1.2%   | 5.7                       | 0.2%   | 1.2                               | 2.2%   |
| 2000-2009 | 3.8    | 2.1%   | 2.0         | 4.6%   | 16                        | 5.4%   | 16                  | -0.5%  | 3.0                                  | 1.3%   | 5.3                       | 1.9%   | 1.0                               | 3.5%   |
| 1990-1999 | 3.1    | 2.3%   | 1.3         | 3.9%   | 11                        | 2.7%   | 16                  | 0.3%   | 3.3                                  | -5.9%  | 4.1                       | 2.1%   | 0.75                              | 3.0%   |
| 1980-1989 | 2.4    | 2.0%   | 0.92        | 3.3%   | 8.5                       | 3.5%   | 15                  | 0.4%   | 3.9                                  | 1.0%   | 3.5                       | 0.7%   | 0.58                              | 1.9%   |
| 1970-1979 | 2.1    | 1.6%   | 0.84        | 3.9%   | 6.3                       | 2.7%   | 15                  | 1.3%   | 3.2                                  | 3.0%   | 3.4                       | 0.7%   | 0.57                              | 0.4%   |
| 1970      | 2.0    |        | 0.66        |        | 5.7                       |        | 14                  |        | 2.9                                  |        | 3.3                       |        | 0.55                              |        |

40  
41

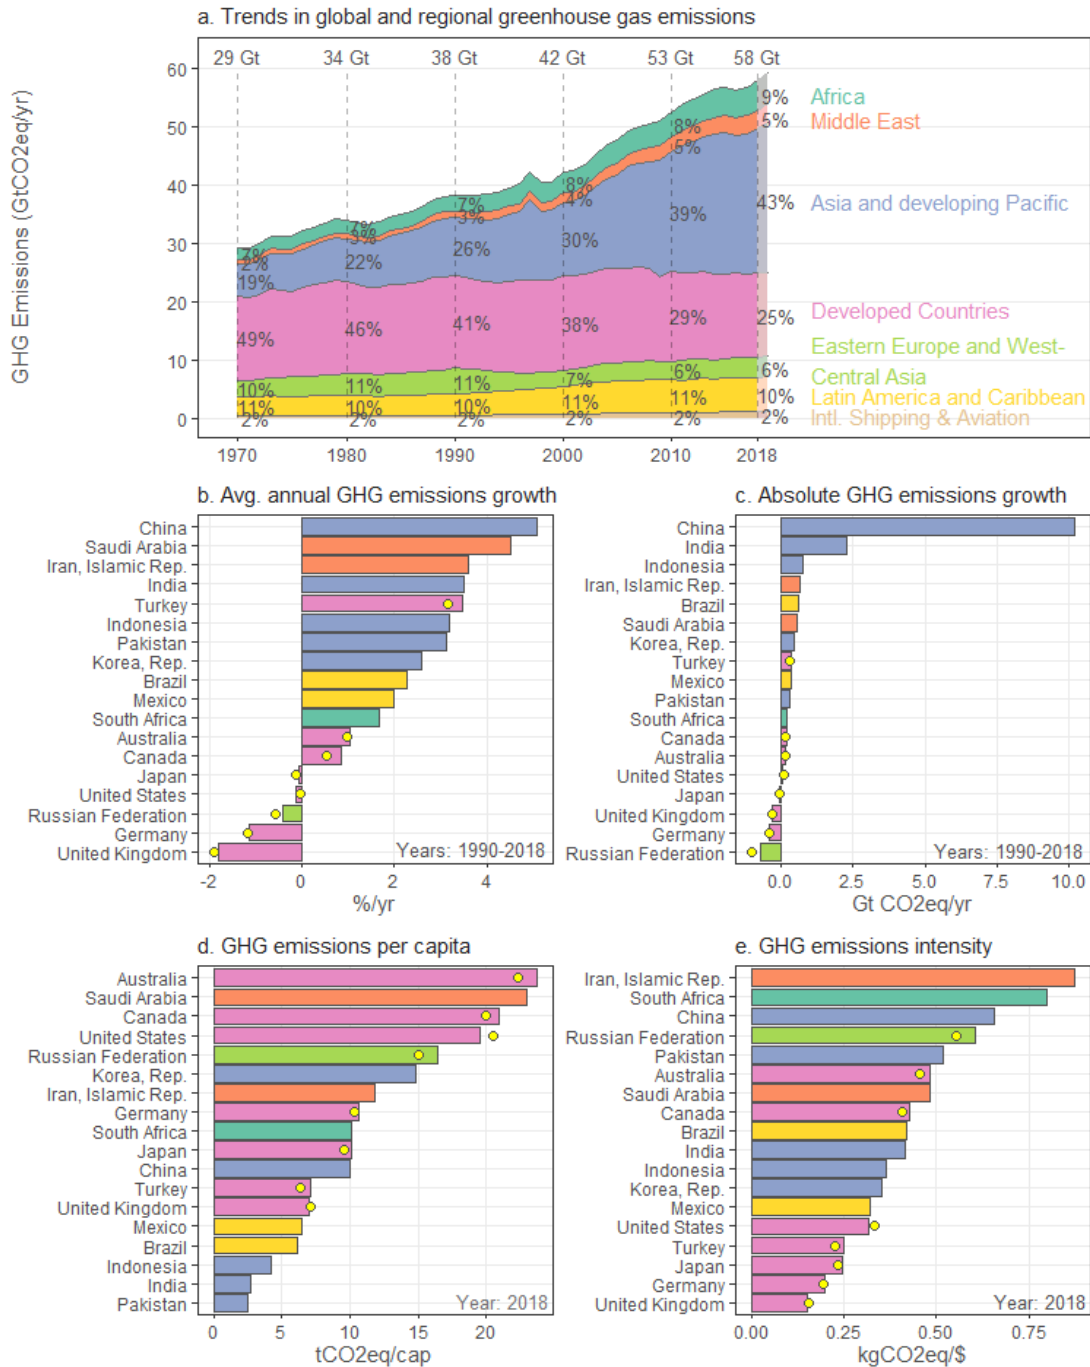

42

43 **Figure S3 – Changes in regional GHGs from multiple perspectives including county contributions:** Panel a: Regional  
 44 GHG emission trends (in GtCO<sub>2</sub>eq yr<sup>-1</sup>) for the time period 1970–2018 with an initial estimate for 2019. Transparent colour for  
 45 2019 estimate indicates its preliminary nature and lower confidence associated with it. GHG emissions from international  
 46 aviation (AIR) and shipping (SEA) are not assigned to individual countries and shown separately. Panels b and c: Average  
 47 annual changes in GHG emissions for largest emitters (75% of global emissions) for the reporting period 1990–2018 in relative  
 48 (% annual change) and absolute terms (GtCO<sub>2</sub>eq yr<sup>-1</sup>). Panels d and e: GHG emissions per capita and per GDP in 2018 for the  
 49 largest emitters (75% of global emissions). GDP estimated using constant international purchasing power parity (USD 2011).  
 50 The yellow dots in panels b–e show emissions data for 2018 from UNFCCC-CRFs (2021) that were accessed through Gütschow  
 51 et al. (2021a). Note that panels b–e do not include CO<sub>2</sub>-LULUCF emissions, because uncertainties are too large for presentation  
 52 at that level. Emissions are converted into CO<sub>2</sub>-equivalents based on global warming potentials with a 100 year time horizon  
 53 (GWP-100) from the IPCC Sixth Assessment Report (Forster et al., 2021).

54

2018 GHG data in GtCO<sub>2</sub>eq/yr

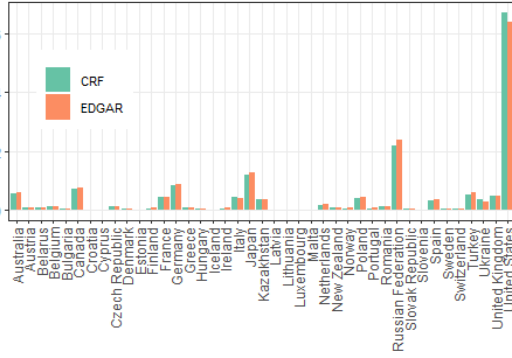

Differences between EDGARv6 and CRF data for GHG (in %)

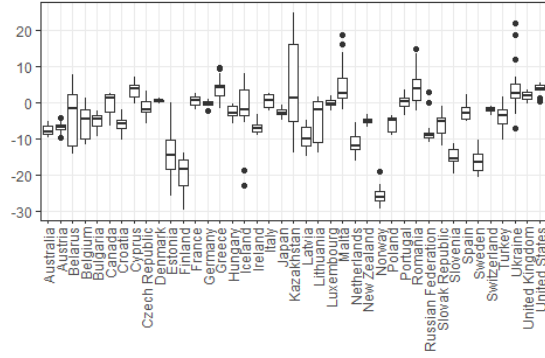

2018 CO<sub>2</sub>-FFI data in GtCO<sub>2</sub>eq/yr

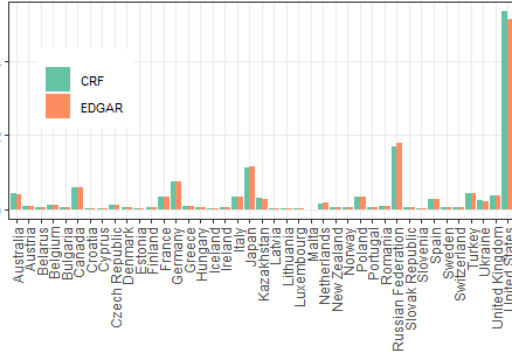

Differences between EDGARv6 and CRF data for CO<sub>2</sub>-FFI (in %)

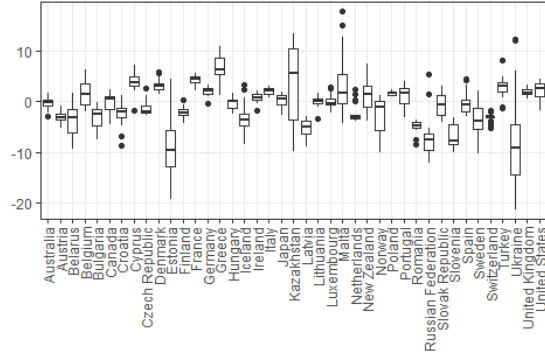

2018 CH<sub>4</sub> data in GtCO<sub>2</sub>eq/yr

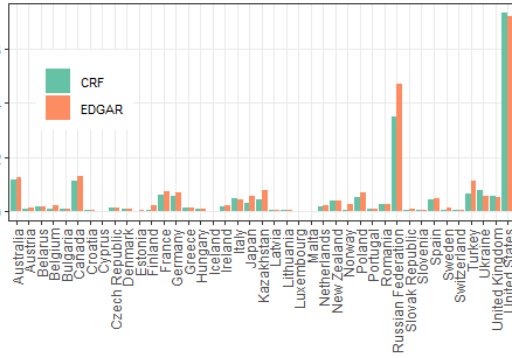

Differences between EDGARv6 and CRF data for CH<sub>4</sub> (in %)

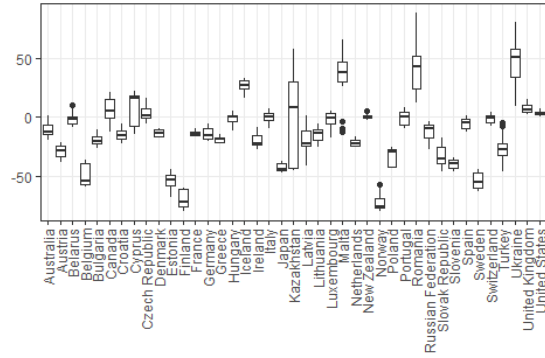

2018 N<sub>2</sub>O data in GtCO<sub>2</sub>eq/yr

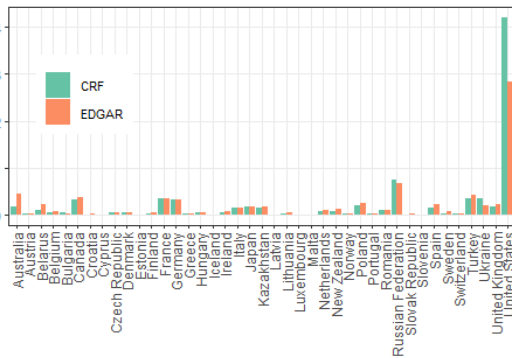

Differences between EDGARv6 and CRF data for N<sub>2</sub>O (in %)

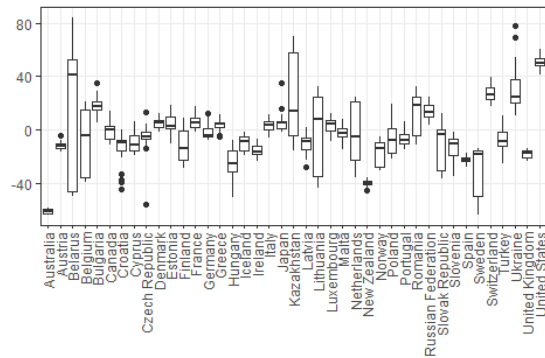

55  
56 **Figure S4 - Differences between the EDGAR data presented in this paper and the data reported by the Annex I**  
57 **countries of the Kyoto Protocol to the UNFCCC via the common reporting framework (CRF):** The left hand panels  
58 depict the 2018 data of both datasets in GtCO<sub>2</sub>eq/yr by country for total GHG, CO<sub>2</sub>-FFI, CH<sub>4</sub> and N<sub>2</sub>O. The right hand plots for  
59 each country for total GHG, CO<sub>2</sub>-FFI, CH<sub>4</sub> and N<sub>2</sub>O. Emissions are converted into CO<sub>2</sub>-equivalents based on global  
60 warming potentials with a 100 year time horizon (GWP-100) from the IPCC Sixth Assessment Report (Forster et al., 2021).  
61 Data reflects most recent UNFCCC CRFs (UNFCCC, 2021) which were accessed through Gütschow et al. (2021).  
62

64 **Table S2 - Average annual anthropogenic GHG emissions and emissions growth by decade and major sector for 1970-2018: Aggregate GHG emission trends are reported in GtCO<sub>2</sub>eq**  
 65 **converted based on global warming potentials with a 100-year time horizon (GWP-100) from the IPCC Sixth Assessment Report (Forster et al., 2021).**

| Average annual emissions levels (GtCO <sub>2</sub> eq yr <sup>-1</sup> ) and emissions growth (%) |                |        |        |        |          |        |           |        |           |        |                                   |        |
|---------------------------------------------------------------------------------------------------|----------------|--------|--------|--------|----------|--------|-----------|--------|-----------|--------|-----------------------------------|--------|
|                                                                                                   | Energy Systems |        | AFOLU  |        | Industry |        | Transport |        | Buildings |        | International Aviation & Shipping |        |
|                                                                                                   | Levels         | Growth | Levels | Growth | Levels   | Growth | Levels    | Growth | Levels    | Growth | Levels                            | Growth |
| 2018                                                                                              | 20             |        | 12     |        | 14       |        | 7.3       |        | 3.3       |        | 1.4                               |        |
| 2009-2018                                                                                         | 19             | 1.2%   | 12     | 0.7%   | 13       | 1.5%   | 6.7       | 2.0%   | 3.1       | 0.6%   | 1.2                               | 2.2%   |
| 2000-2009                                                                                         | 16             | 2.8%   | 11     | 0.8%   | 10       | 4.1%   | 5.8       | 1.8%   | 3.0       | 0.6%   | 1.0                               | 3.5%   |
| 1990-1999                                                                                         | 13             | 1.5%   | 10     | 0.0%   | 8.1      | 0.9%   | 4.7       | 2.0%   | 3.0       | -0.2%  | 0.75                              | 3.0%   |
| 1980-1989                                                                                         | 10             | 2.1%   | 9.9    | 1.2%   | 7.9      | 0.5%   | 3.7       | 2.3%   | 2.9       | 1.5%   | 0.58                              | 1.9%   |
| 1970-1979                                                                                         | 8.4            | 3.3%   | 9.4    | -0.2%  | 7.3      | 1.9%   | 3.0       | 3.9%   | 2.8       | 1.2%   | 0.57                              | 0.4%   |
| 1970                                                                                              | 7.2            |        | 9.5    |        | 6.9      |        | 2.5       |        | 2.7       |        | 0.55                              |        |

66  
 67  
 68  
 69  
 70

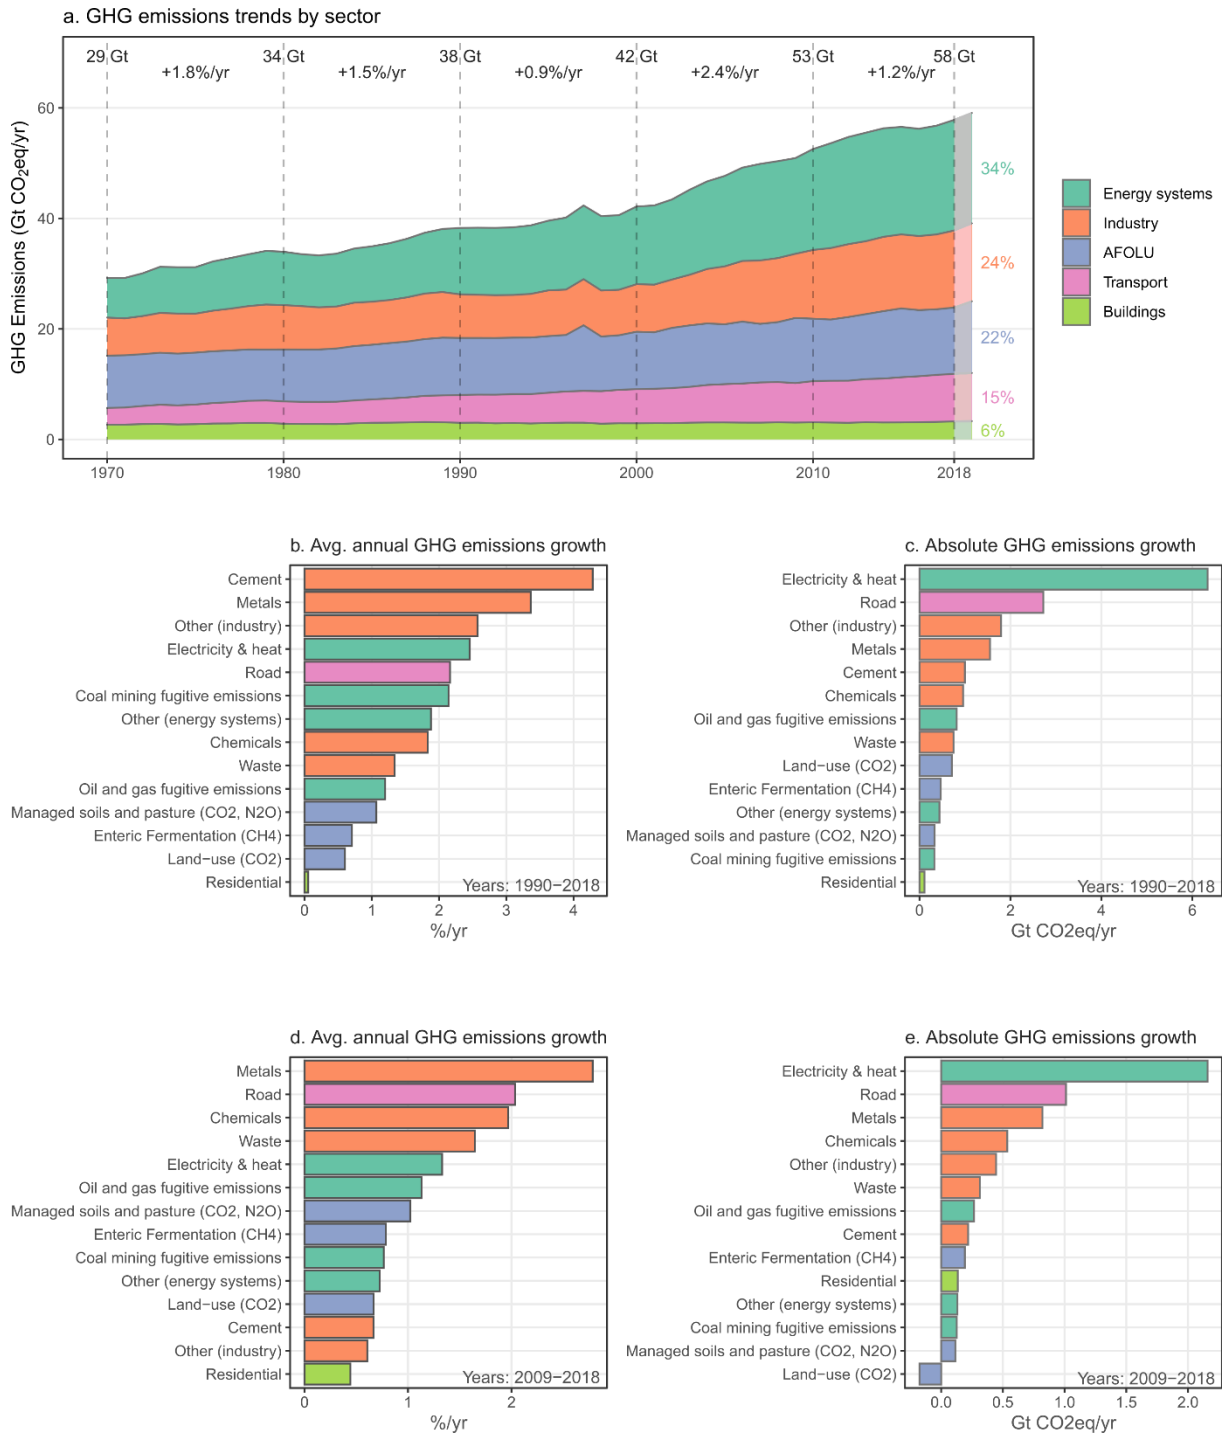

71

72 **Figure S5 – Changes in sectoral GHGs from multiple perspectives including sub-sector contributions:** Panel a: Trends  
 73 in total annual anthropogenic GHG emissions (in GtCO<sub>2</sub>eq) 1970-2018 with an extension to 2019 by major economic sector.  
 74 Transparent colour for 2019 estimate indicates its preliminary nature and lower confidence associated with it. AFOLU refers  
 75 to GHG emissions from agriculture, forestry and other land-use change. Panels b and c: Largest sub-sectoral (90% of total  
 76 emissions) average annual changes in GHG emissions for the reporting period 1990-2018 in relative (% annual change) and  
 77 absolute terms (GtCO<sub>2</sub>eq yr<sup>-1</sup>). Panels d and e: Largest sub-sectoral (90% of total emissions) average annual changes in GHG  
 78 emissions for the reporting period 2009-2018 in relative (% annual change) and absolute terms (GtCO<sub>2</sub>eq yr<sup>-1</sup>). Emissions are  
 79 converted into CO<sub>2</sub>-equivalents based on global warming potentials with a 100 year time horizon (GWP-100) from the IPCC  
 80 Sixth Assessment Report (Forster et al., 2021).

81

82

83 **References**

- 84 Forster, P., Ramaswamy, V., Artaxo, P., Berntsen, T., Betts, R., Fahey, D. W., Haywood, J., Lean, J., Lowe, D.  
85 C., Myhre, G., Nganga, J., Prinn, R., Raga, G., Schulz, M. and Dorland, R. Van: Changes in Atmospheric  
86 Constituents and in Radiative Forcing, in *Climate Change 2007: The Physical Science Basis*. Contribution of  
87 Working Group I to the Fourth Assessment Report of the Intergovernmental Panel on Climate Change, edited by  
88 S. Solomon, D. Qin, M. Manning, Z. Chen, M. Marquis, K. B. Averyt, M. Tignor, and H. L. Miller, Cambridge  
89 University Press, Cambridge, United Kingdom and New York, NY, USA., 2007.
- 90 Forster, P., Storelvmo, T., Armour, K. and et al.: The Earth's energy budget, climate feedbacks, and climate  
91 sensitivity, in *Work Group 1 Contribution to the Sixth Sixth Assessment Report (Second Order Draft)*., 2020.
- 92 Forster, P. M., Storelvmo, T., Armour, K., Collins, W., Dufresne, J. L., Frame, D., Lunt, D. J., Mauritsen, T.,  
93 Palmer, M. D., Watanabe, M., Wild, M. and Zhang, H.: Chapter 7: The Earth's Energy Budget, Climate Feedbacks,  
94 and Climate Sensitivity, in *Climate Change 2021: The Physical Science Basis*. Contribution of Working Group I  
95 to the Sixth Assessment Report of the Intergovernmental Panel on Climate Change, edited by V. Masson-Delmotte,  
96 P. Zhai, A. Pirani, S. L. Connors, C. Péan, S. Berger, N. Caud, Y. Chen, L. Goldfarb, M. I. Gomis, M. Huang, K.  
97 Leitzell, E. Lonnoy, J. B. R. Matthews, T. K. Maycock, T. Waterfield, O. Yelekçi, R. Yu, and B. Zhou, p. in press,  
98 Cambridge University Press, Oxford, UK., 2021.
- 99 Gütschow, J., Jeffery, M. L. and Günther, A.: PRIMAP-crf: UNFCCC CRF data in IPCC categories (PRIMAP-  
100 crf-2021-v1), , doi:10.5281/ZENODO.4723476, 2021.
- 101 Myhre, G., Shindell, D., Bréon, F.-M., Collins, W., Fuglestvedt, J., Huang, J., Koch, D., Lamarque, J.-F., Lee, D.,  
102 Mendoza, B., Nakajima, T., Robock, A., Stephens, G., Takemura, T. and Zhang, H.: Chapter 8: Anthropogenic  
103 and Natural Radiative Forcing, in *Climate Change 2013: The scientific basis*. Contribution of Working Group I to  
104 the 5th Assessment Report of the Intergovernmental Panel on Climate Change, edited by T. F. Stocker, D. Qin,  
105 G.-K. Plattner, M. Tignor, S. K. Allen, J. Boschung, A. Nauels, Y. Xia, V. Bex, and P. M. Midgley, Cambridge  
106 University Press, Cambridge, UK, and New York, USA., 2013.
- 107 Olivier, J. G. and Peters, J. A. H. W.: *Trends in CO2 and total greenhouse gas emissions: 2019 Report*, The Hague,  
108 Netherlands., 2020.
- 109 UNFCCC: *National Inventory Submissions 2021*, [online] Available from: [https://unfccc.int/ghg-inventories-](https://unfccc.int/ghg-inventories-annex-i-parties/2021)  
110 [annex-i-parties/2021](https://unfccc.int/ghg-inventories-annex-i-parties/2021) (Accessed 30 September 2021), 2021.
- 111 US-EPA: *Global Non-CO2 Greenhouse Gas Emission Projections & Mitigation*, Washington D.C., USA. [online]  
112 Available from: <https://www.epa.gov/global-mitigation-non-co2-greenhouse-gases>, 2019.
- 113
- 114
